# Supplementary material
Source: PubMed Central journal article supplement (PMC7105328)
Supplement: suppl_fig1_deaa015.pdf [file suppl_fig1_deaa015.pdf]

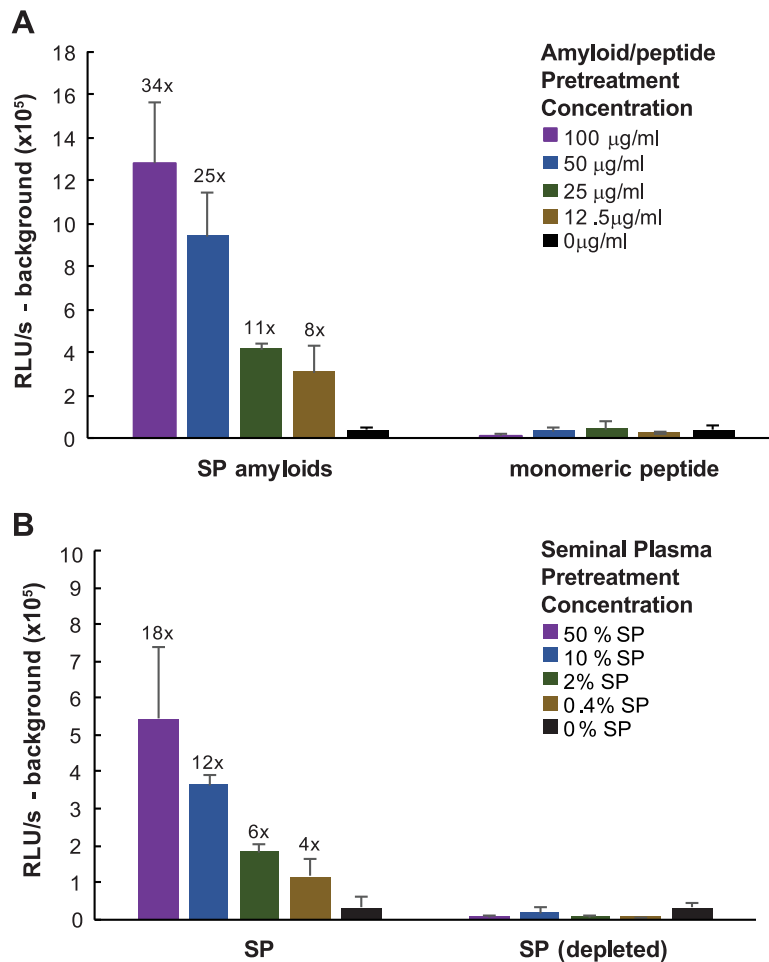

**Supplementary Figure S1 Confirmation of functional activity of purified and endogenous HIV-enhancing amyloids.** (A) The indicated concentrations of purified synthetic semen amyloids, or the corresponding monomeric peptide as a negative control, were incubated with HIV-1 and then added to the reporter cell line TZM-bl. Infection levels were then measured 3 days later by quantifying luciferase activity. (B) The indicated concentrations of SP, or SP depleted of HIV-enhancing amyloids, were incubated with HIV-1 and then added to the reporter cell line TZM-bl. Infection levels were then measured 3 days later by quantifying luciferase activity. Numbers above each column correspond to the fold-enhancement of infection rates relative to infection in the presence of the virus alone.
