# Supplementary material
Source: PubMed Central journal article supplement (PMC7105328)
Supplement: suppl_fig2_deaa015.pdf [file suppl_fig2_deaa015.pdf]

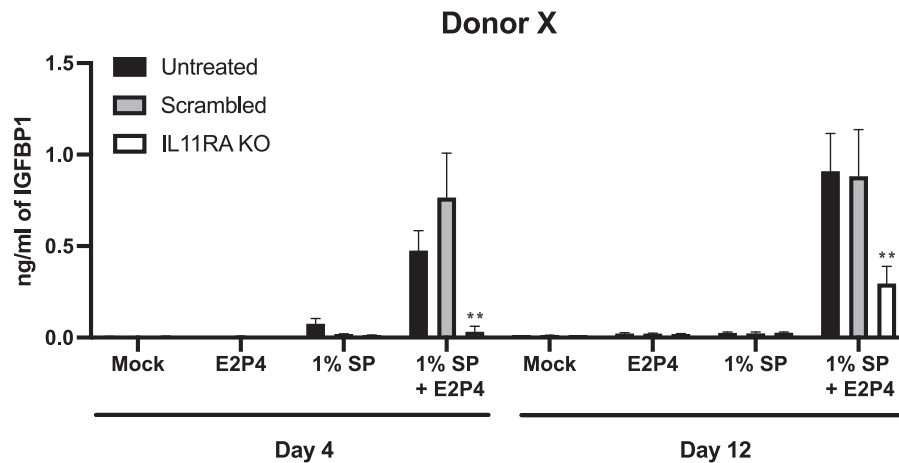

**Supplementary Figure S2 CRISPR/Cas-9-mediated knockout of interleukin-11 receptor reveals IL-11 signaling is important for decidualization induced by 1% SP.** (A) IL-11RA KO eSFs, scrambled negative control eSFs and unedited (untreated) eSFs were treated with media alone, estradiol with progesterone (E<sub>2</sub>P<sub>4</sub>) 1% SP or E<sub>2</sub>P<sub>4</sub> + 1% SP. After 4 or 12 days of treatment, culture supernatants were assessed for decidualization by measuring IGFBP1 levels by ELISA. Each value corresponds to the mean ± SD of cultures set up in quadruplicate. \*\**P* < 0.01 indicates a significant decrease in IGFBP1 levels in the IL-11RA KO as compared with the scrambled negative control.
